# Supplementary material for: Financial analysis of decentralized water reuse systems in mission critical facilities at U.S. Army installations
Source: Royal Society of Chemistry journal article supplement (doi:10.1039/d3ew00624g), 2024-01-01
Supplement: d3ew00624g1.pdf [file d3ew00624g1.pdf]

Electronic Supplementary Material (ESI) for Environmental Science: Water Research & Technology

Electronic Supplementary Information (ESI)

**Economic Analysis of Decentralized Water Reuse Systems in Mission Critical Buildings at U.S. Army Installations**

Andy Y. Hur<sup>1,2\*</sup>, Martin A. Page<sup>1</sup>, Jeremy S. Guest<sup>2</sup>, and Christine M. Ploschke<sup>3</sup>

- <sup>1</sup> U.S. Army Engineer Research and Development Center, Construction Engineering Research Laboratory; P.O. Box 9005, Champaign, IL 61826  
<sup>2</sup> University of Illinois at Urbana-Champaign, Department of Civil and Environmental Engineering; 205 N. Mathews Ave, Urbana, IL 61801  
<sup>3</sup> Office of the Secretary of the Army for Installation, Energy, and Environment; 110 Army Pentagon, Washington, D.C. 20310

List of Tables

**Table ESI-1.** Assumptions associated with each of water reuse scenario at mission critical facilities along with values and citations thereof.

List of Figures

**Figure ESI-1.** Capital cost curve along with annualized costs of decentralized water reuse systems.

## Section S1. Cost Functions of Water Reuse Systems at Different Design Scale

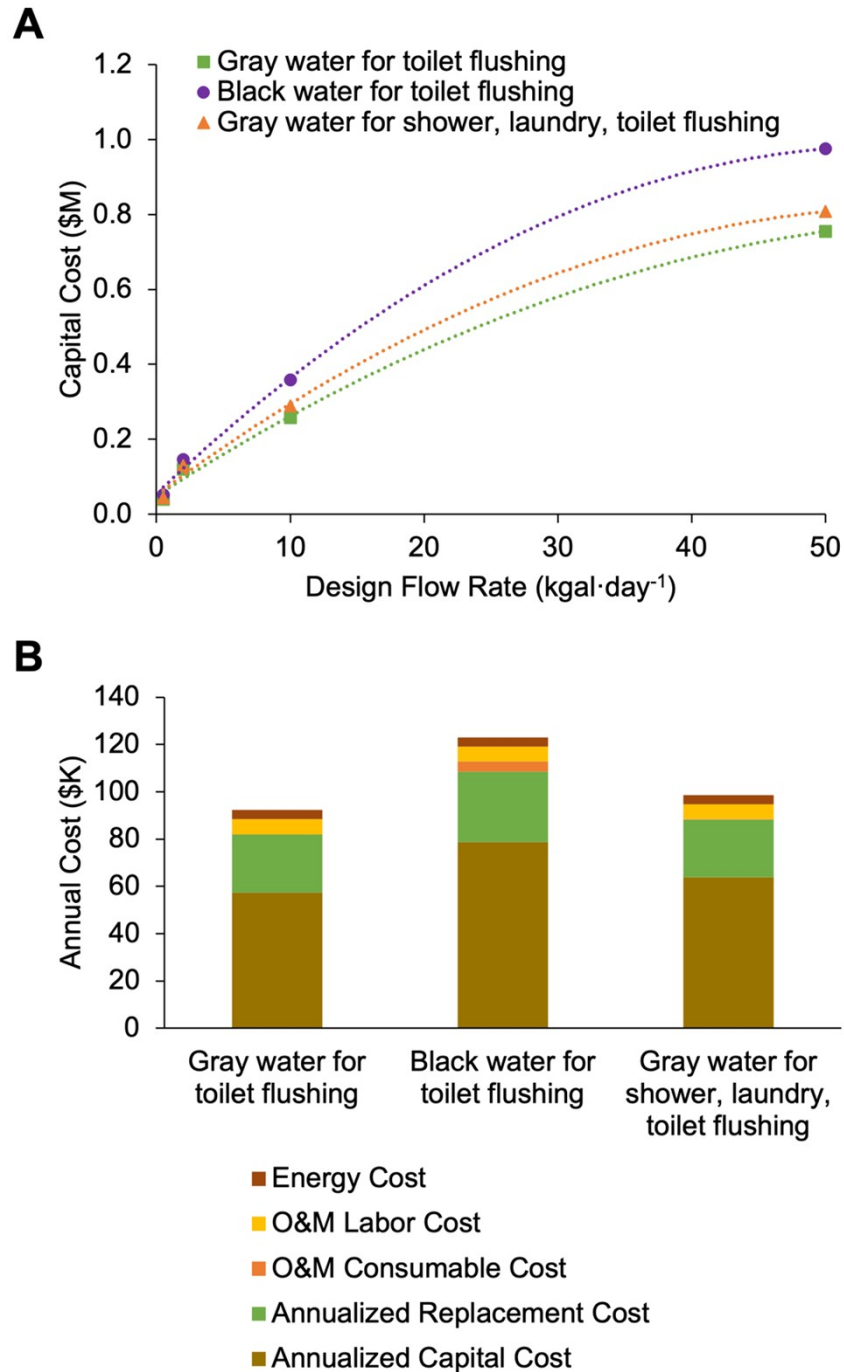

**Figure ESI-1.** (A) Capital cost curve of decentralized water reuse systems at different design flow rate. Green square = Gray water for toilet flushing. Purple circle = Black water for toilet flushing. Orange triangle = Gray water for shower, laundry, and toilet flushing. (B) Annualized water reuse system ( $28.2 \text{ kgal} \cdot \text{day}^{-1}$ ) costs with 15 years system life and 6% discount rate.

## Section S2. Determination of Economic Benefit

### S2.1 Life Cycle Cost

The life cycle cost of system can be calculated as follows:

$$LCC = C_{Capital} + \sum_{i=1}^n C_{Recurring} \times \left[ \frac{1}{(1+d)^n} \right] \quad (\text{Equation S1})$$

where  $LCC$  is the life cycle cost in present value (\$),  $C_{Capital}$  is the capital cost (\$),  $C_{Recurring}$  is the recurring costs for operation and maintenance (\$·year<sup>-1</sup>),  $d$  is the discount rate, and  $n$  is the number of years between the base date and the occurrence of the cost.

### S.2.2 Cost Savings

The cost savings associated with water demand offset can be calculated as follows:

$$C_{Saving} = P_{Water} \times \sum_{i=1}^n D_{Water\ Saving} \times \left[ \frac{1}{(1+d)^n} \right] \quad (\text{Equation S2})$$

where  $C_{Saving}$  is the cost saving in present value (\$),  $P_{Water}$  is the unit price of water (\$·kgal<sup>-1</sup>),  $D_{Water\ Saving}$  is the annual water demand offset (kgal·year<sup>-1</sup>),  $d$  is the discount rate, and  $n$  is the number of years between the base date and the occurrence of the cost.

### S.2.3 Net Savings

The net savings (\$) is the difference between water cost savings and life cycle cost of system in present value and can be computed as follows:

$$Net\ Savings = C_{Savings} - LCC \quad (\text{Equation S3})$$

### S.2.4 Return on Investment

The return on investment (ROI) of system can be computed as follows:

$$ROI = \frac{Net\ Savings}{LCC} \times 100 \quad (\text{Equation S4})$$

where,  $ROI$  is the return on investment of system (%),  $Net\ Savings$  is the difference between water cost savings and life cycle cost of system (\$), and  $LCC$  is the life cycle cost of system (\$).

## Section S3. Uncertainty Modeling and Calculations

### S3.1 Assumption for Uncertain Parameter

Table ESI-1. Assumptions associated with each of water reuse scenario at mission critical facilities along with values and citations thereof.

| Assumption                                                                         | Value                              | Citation            |
|------------------------------------------------------------------------------------|------------------------------------|---------------------|
| <b>General</b>                                                                     |                                    |                     |
| Treatment system water recovery rate (%)                                           | 70                                 | -                   |
| Capital cost upper range (\$)                                                      | 15% from baseline                  | -                   |
| Capital cost lower range (\$)                                                      | -15% from baseline                 | -                   |
| O&M costs upper range (\$)                                                         | 15% from baseline                  | -                   |
| O&M costs lower range (\$)                                                         | -15% from baseline                 | -                   |
| Number of Monte Carlo simulations (n)                                              | 1000                               | -                   |
| <b>Water reuse for shower, laundry, and toilet flushing at a barracks building</b> |                                    |                     |
| Water unit price (\$·kgal <sup>-1</sup> )                                          | Triangular (8.5, 10,12)            | 1                   |
| Electricity price (\$·kWh <sup>-1</sup> )                                          | Norm (0.15, 0.011)                 | 2                   |
| Water demand (kgal·day <sup>-1</sup> )                                             | Triangular (28.2, 33.9, 39.5)      | 3–5                 |
| Discount rate                                                                      | Triangular (0.04, 0.06, 0.07)      | 6,7                 |
| Membrane replacement period (years)                                                | Triangular (8, 10, 11)             | -                   |
| Capital cost (\$)                                                                  | Dependent on building water demand | Vendor quote<br>8,9 |
| O&M costs (\$·year <sup>-1</sup> )                                                 | Dependent on building water demand | Vendor quote<br>8,9 |
| <b>Water reuse for server cooling at a data center</b>                             |                                    |                     |
| Blowdown                                                                           | 30%                                | 10                  |
| Water unit price (\$·kgal <sup>-1</sup> )                                          | Triangular (8.5, 10,12)            | 1                   |
| Electricity price (\$·kWh <sup>-1</sup> )                                          | Norm (0.15, 0.011)                 | 2                   |
| Water demand (kgal·day <sup>-1</sup> )                                             | Triangular (88.2, 98, 107.8)       | 3,11                |
| Discount rate                                                                      | Triangular (0.04, 0.06, 0.07)      | 6,7                 |
| Membrane replacement period (years)                                                | Triangular (8, 10, 11)             | -                   |
| Capital cost (\$)                                                                  | Dependent on building water demand | Vendor quote<br>8,9 |
| O&M costs (\$·year <sup>-1</sup> )                                                 | Dependent on building water demand | Vendor quote<br>8,9 |

### S.3.2 Spearman's Rank Correlation Coefficient

$$\rho = 1 - \frac{6 \sum_{i=1}^n [R(x_i) - R(y_i)]^2}{n(n^2 - 1)}$$

(Equation S5)

where  $\rho$  is the Spearman's rank correlation coefficient,  $n$  is the number of Monte Carlo simulations,  $x_i$  is the value of an uncertain parameter in simulation  $i$ ,  $y_i$  is the output (system return on investment) for simulation  $i$ , and  $R(\cdot)$  is the relative rank of  $x_i$  and  $y_i$  across the  $n$  simulations.

## References

- (1) Department of the Army. *Army Energy and Water Reporting System (AEWRS) Water Rate Report*; Office of the Assistant Chief of Staff for Installation Management (OACSIM), 2016.
- (2) U.S. Bureau of Labor Statistics. Electricity per KWH in U.S. City Average, Average Price, Not Seasonally Adjusted. [https://data.bls.gov/timeseries/APU000072610?amp%253bdata\\_tool=XGtable&output\\_view=data&include\\_graphs=true](https://data.bls.gov/timeseries/APU000072610?amp%253bdata_tool=XGtable&output_view=data&include_graphs=true) (accessed 2022-12-28).
- (3) Jenicek, E.; Garfinkle, N.; Hur, A.; Oberg, B.; Bartholomew, N.; Buchhorn, S.; Chen, K.; Miller, L.; Mithaiwala, M. *Water Use Intensity at U.S. Army Facilities : An Investigation into Factors That Influence Potable Water End Use*; Construction Engineering Research Laboratory (U.S.), 2018. <https://doi.org/10.21079/11681/28040>.
- (4) McMordie Stoughton, K.; Williamson, J.; Boyd, B.; Cabe, J.; Brown, S.; Dixon, D.; Loper, S.; Elliott, D.; Wendel, E.; Rosa, M. D. L.; Giever, E.; Russell, B. *Army Net Zero Water Balance and Roadmap Programmatic Summary*; Pacific Northwest National Laboratory for the United States Army, 2013.
- (5) Jenicek, E. M.; Garfinkle, N. W.; Curvey, L. E.; Case, M. P.; Choi, M.; Stumpf, A. L. Methods of Estimating Water End Use at US Army Installations. *Journal - American Water Works Association* **2016**, *108* (2). <https://doi.org/10.5942/jawwa.2016.108.0004>.
- (6) Office of Management and Budget. M-22-13. 2022 Discount Rates for OMB Circular No. A-94.
- (7) Office of Management and Budget. Circular A-94. Guidelines and Discount Rates for Benefit-Cost Analysis of Federal Programs.
- (8) Jenicek, E. M.; Page, M.; Hur, A.; Ahern, D.; Garfinkle, N. *Integrated Water Planning Through Building Level Cascade of Water Use*; ESTCP Project #EW-201155, Energy and Water Projects; SERDP/ESTCP, 2018.
- (9) Schoen, M. E.; Jahne, M. A.; Garland, J. A Risk-Based Evaluation of Onsite, Non-Potable Reuse Systems Developed in Compliance with Conventional Water Quality Measures. *Journal of Water and Health* **2020**, *18* (3), 331–344. <https://doi.org/10.2166/wh.2020.221>.
- (10) Plata, S. L.; Devenport, C. L.; Miara, A.; Sitterley, K. A.; Evans, A.; Talmadge, M.; Van Allsburg, K. M.; Kurup, P.; Cox, J.; Kerber, S.; Howell, A.; Breckenridge, R.; Manygoats, C.; Stokes-Draut, J. R.; Macknick, J.; Childress, A. E. Zero Liquid Discharge and Water

- Reuse in Recirculating Cooling Towers at Power Facilities: Review and Case Study Analysis. *ACS EST Eng.* **2022**, 2 (3), 508–525. <https://doi.org/10.1021/acsestengg.1c00377>.
- (11) Mytton, D. Data Centre Water Consumption. *npj Clean Water* **2021**, 4 (1), 11. <https://doi.org/10.1038/s41545-021-00101-w>.
